# Supplementary material for: Structural basis of bile acid lateral diffusion facilitated by the OSTα/β transporter
Source: Research Square preprint supplement (doi:10.21203/rs.3.rs-8254570/v1), 2026-01-30
Supplement: Supplementary file 1 [file eddcc3c6b0eee8c9e39df7f3.docx]

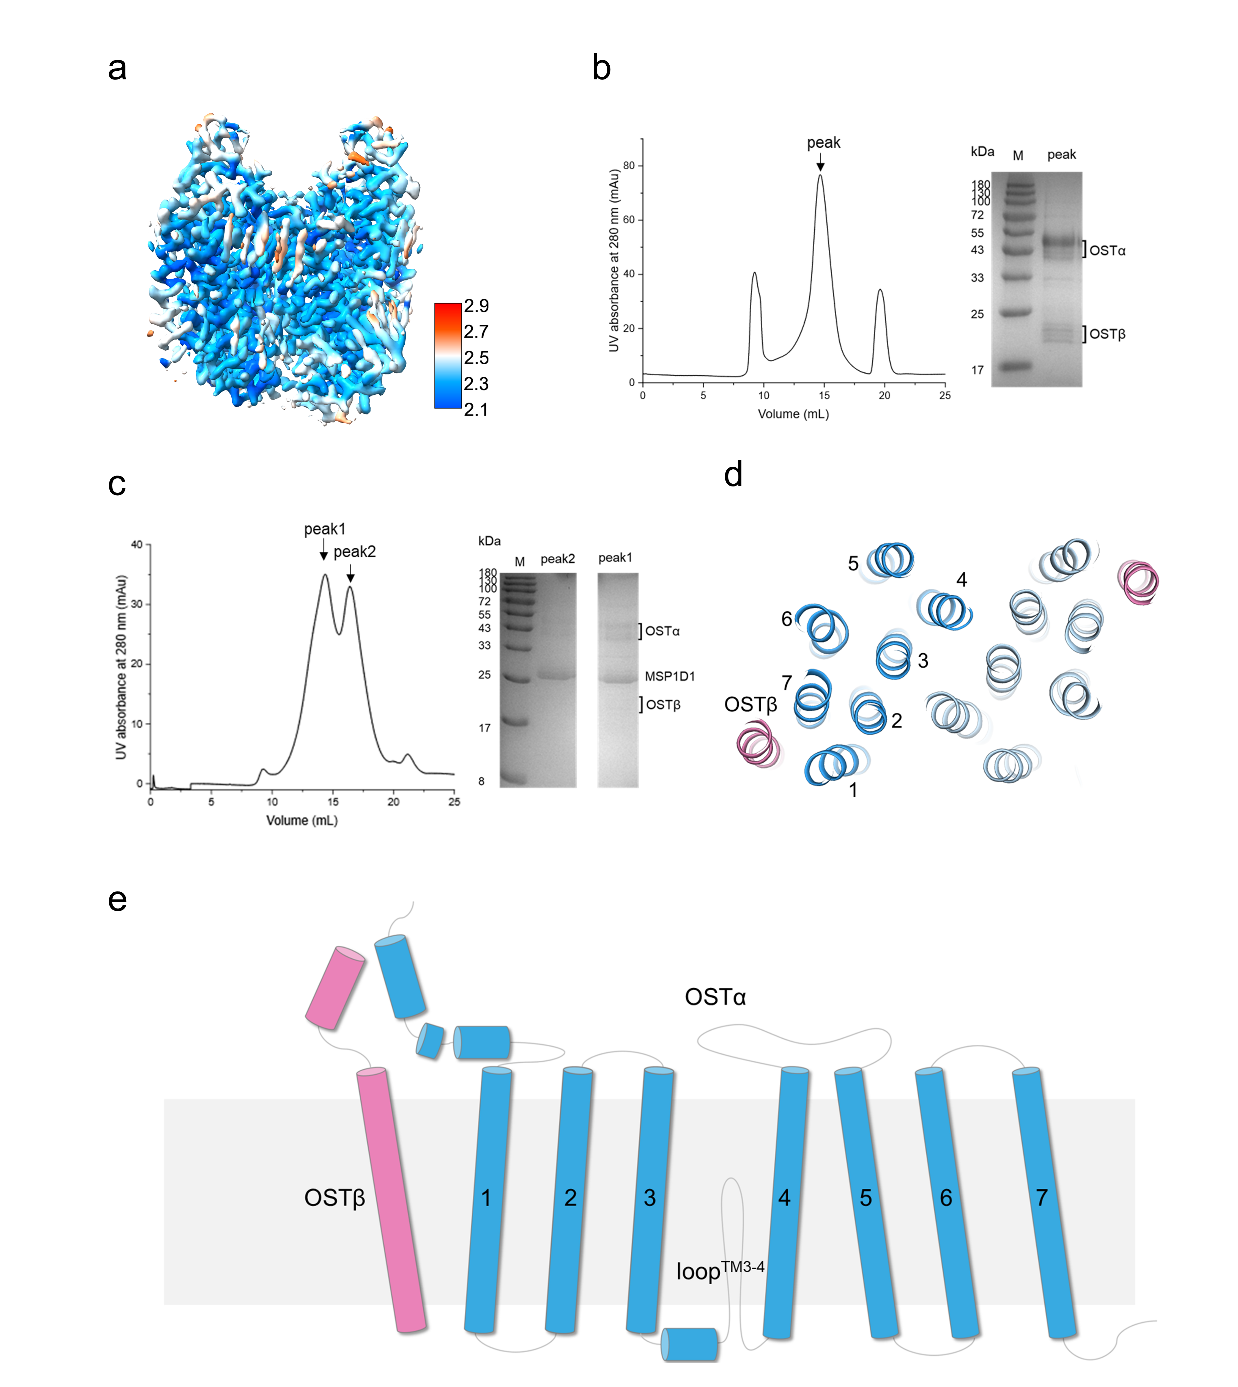
**Supplementary Fig. 1 Purification and structural features of OSTα/β**

**a**. Refined cryo-EM map of OSTα/β complex structure. The cryo-EM maps are colored by UCSF ChimeraX 1.5 according to the local resolution of the cryo-EM estimated by cryoSPARC 4.7.1

**b**. The size exclusion chromatography profiles of human OSTα/β in the detergent LMNG and **c.** in nanodiscs. The peak fractions were applied to SDS-PAGE and visualized by Coomassie blue staining.

**d**. Top view of OSTα/β complex. Dark blue and light blue denote each OSTα monomer, OSTβ are colored pink.

**e**. Topology of the OSTα/β complex. OSTα is colored blue and OSTβ is colored pink.


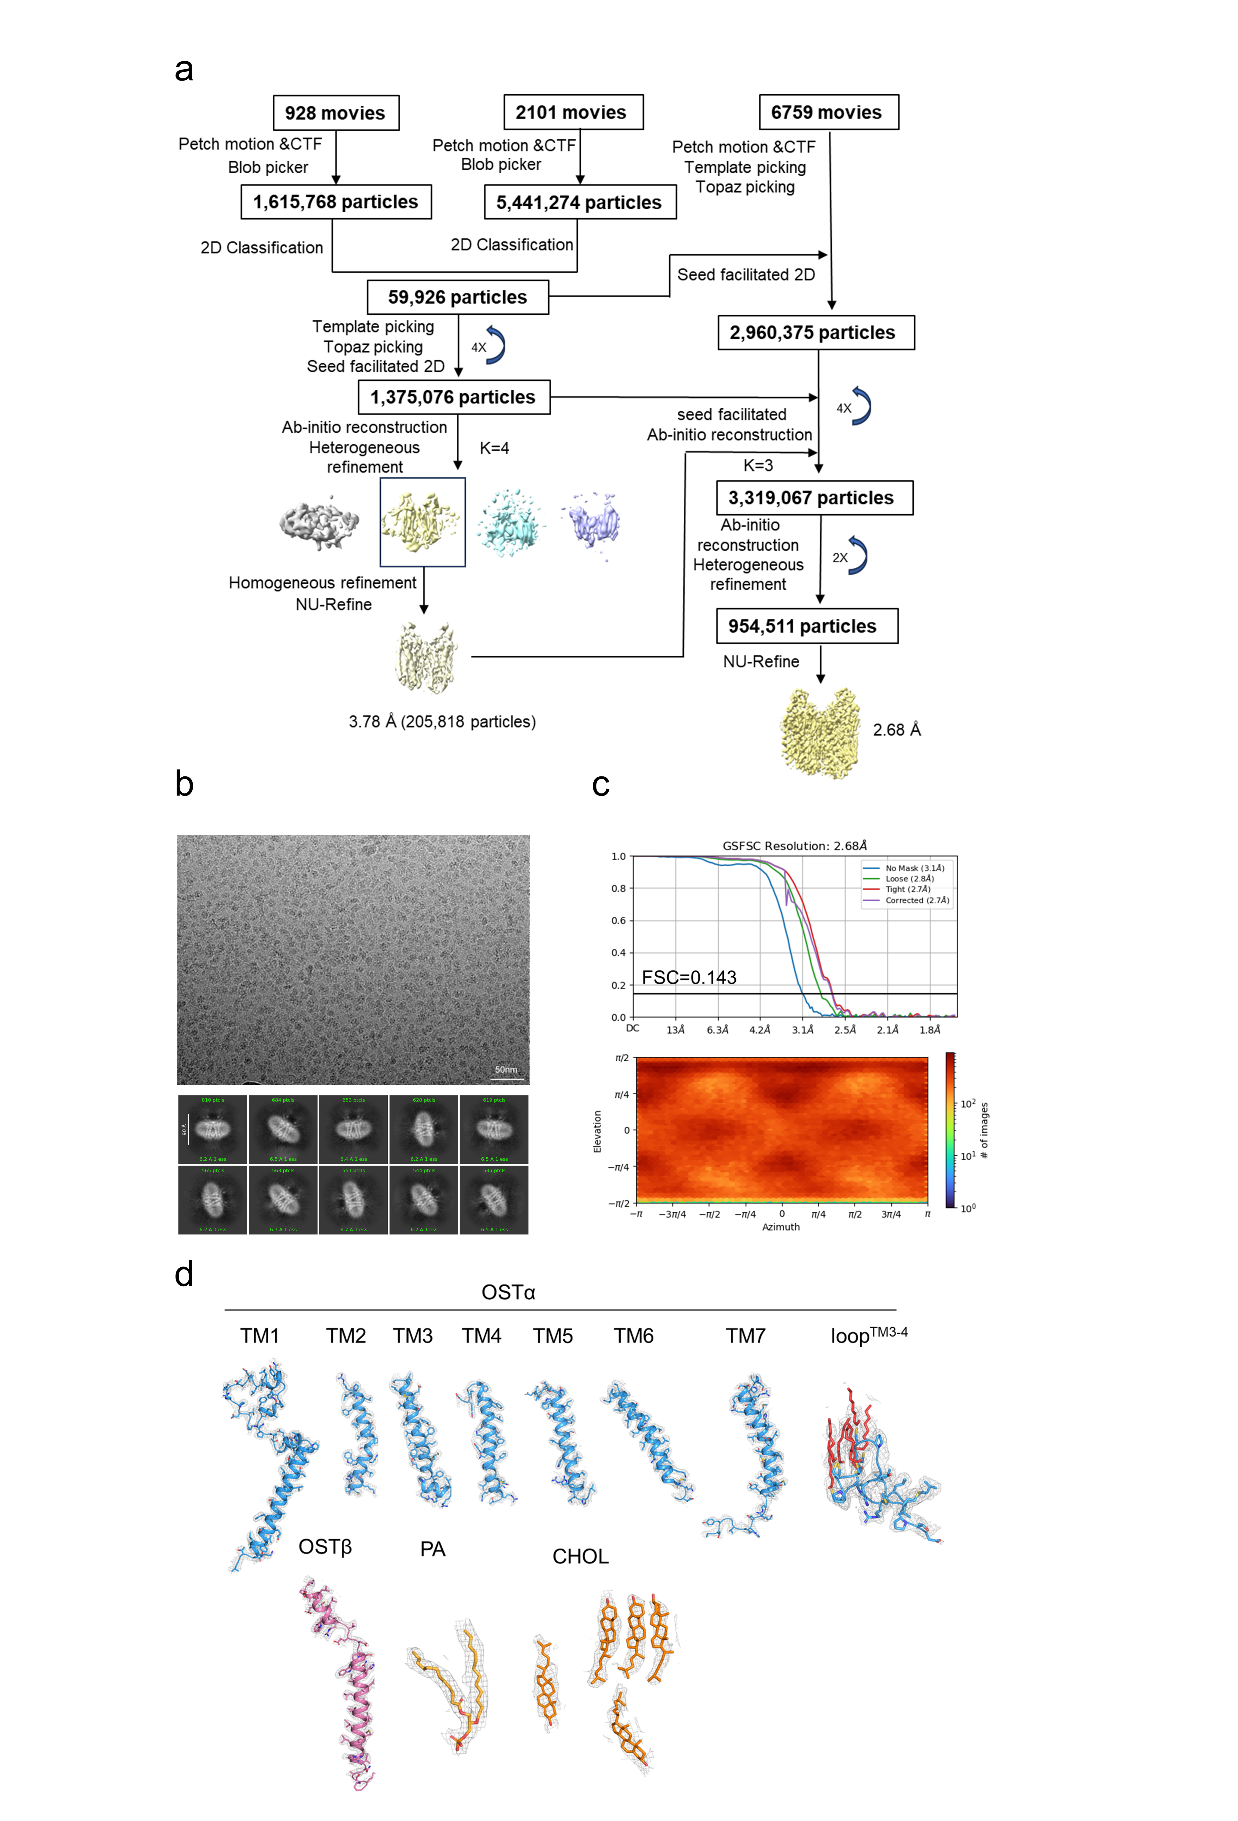


**Supplementary Fig. 2 Data processing and model building of** **OSTα/β complex**.

**a**. Flowchart of the cryo-EM data processing by cryoSPARC v4.7.1.

**b** Representative cryo-EM micrograph and 2D averages. Bar: 50 nm.

**c**. Fourier shell correlation (FSC) curves and Euler angle distributions of the classified particles used for the final 3D refinement of the overall maps for OSTα/β complex.

**d**. Cryo-EM maps for representative segments of the OSTα/β. The structure was reconstructed with C2 symmetry, and only half of the representative segments are thus presented. Contour levels are set at 5σ.


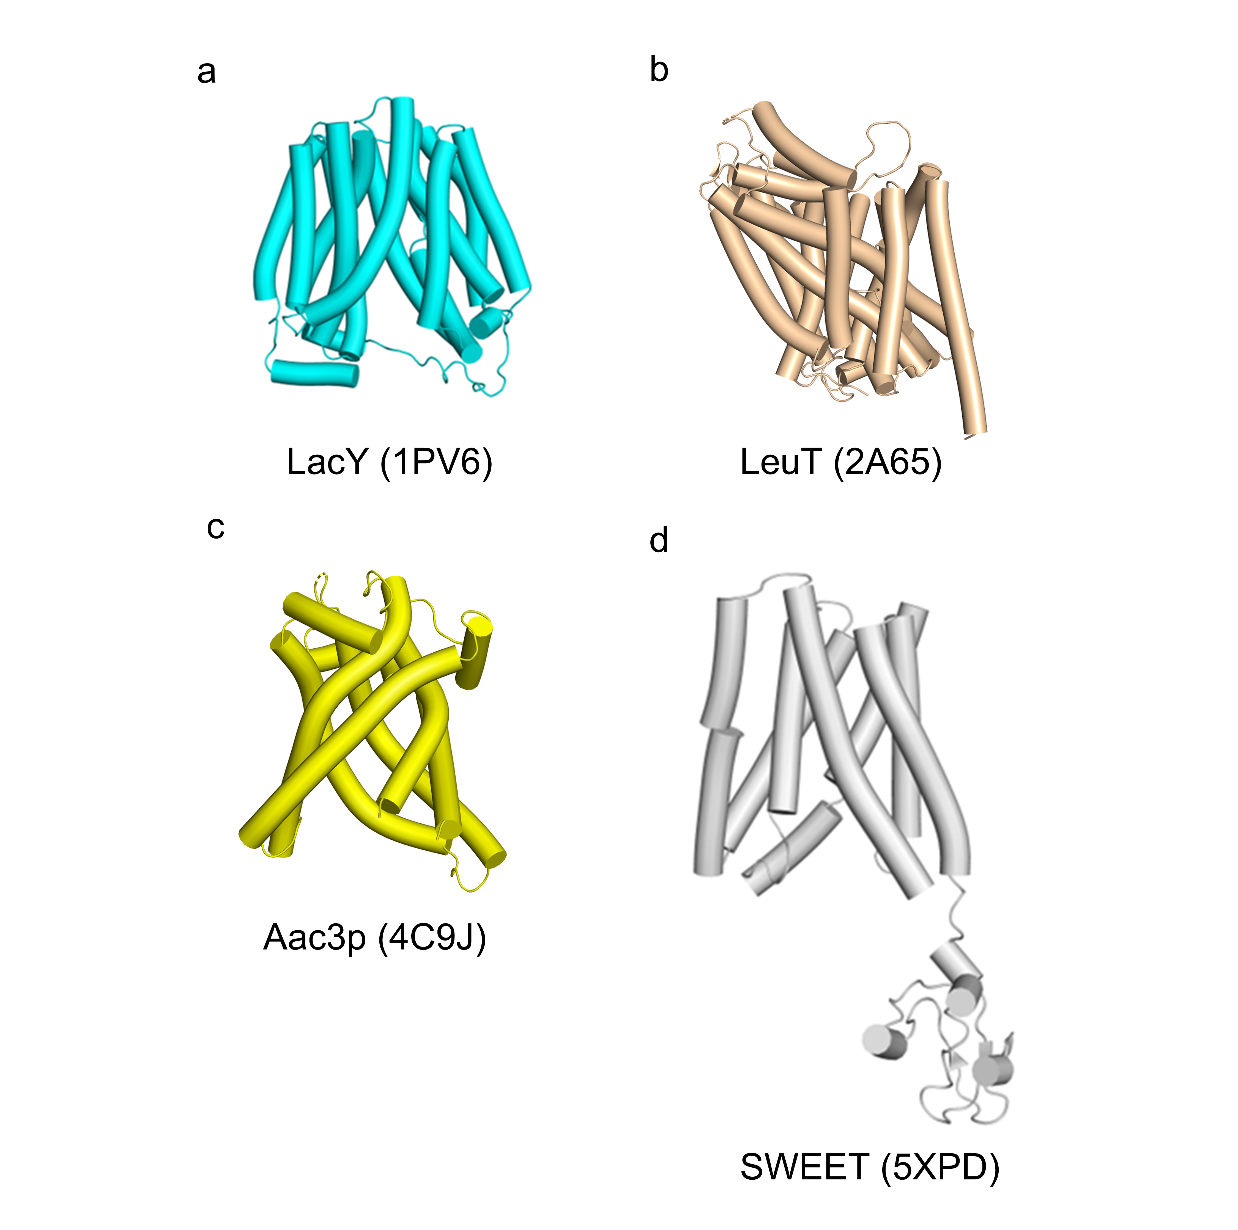


**Supplementary Fig. 3 Representative structural folds of reported SLC transporters.**

**a**. Lactose permease LacY from *E. coli.* LacY contains 12 TMs, with the N-terminal and C-terminal six TMs forming two distinct helical bundles connected by a long loop between TM 6 and 7. The two 6-TM domains share the same topology and exhibit an approximate two-fold symmetry1.

**b**. Sodium-coupled leucine transporter LeuT from *Aquifex aeolicus*. LeuT contains 12 TMs, with an internal structural repeat in the first 10 TMs: TM1–TM5 and TM6–TM10 exhibit 176.5° rotational symmetry around a pseudo-two-fold axis within the membrane plane2.

**c**. ADP/ATP carriers Aac3p from *Saccharomyces cerevisiae*, Aac3p contains 6 TMs, tilted at approximately 45° relative to the membrane plane. The odd-numbered TMs are kinked at proline or serine residues, forming a barrel-like structure with threefold pseudosymmetry3.

**d**. Sugar transporter SWEET from *Arabidopsis thaliana.* Each SWEET comprises 7 TMs. The N-terminal and C-terminal 3 TMs form 6-TM THB domains, as an inversion linker, TM4 spans the membrane and orients THB2 parallel to THB14.


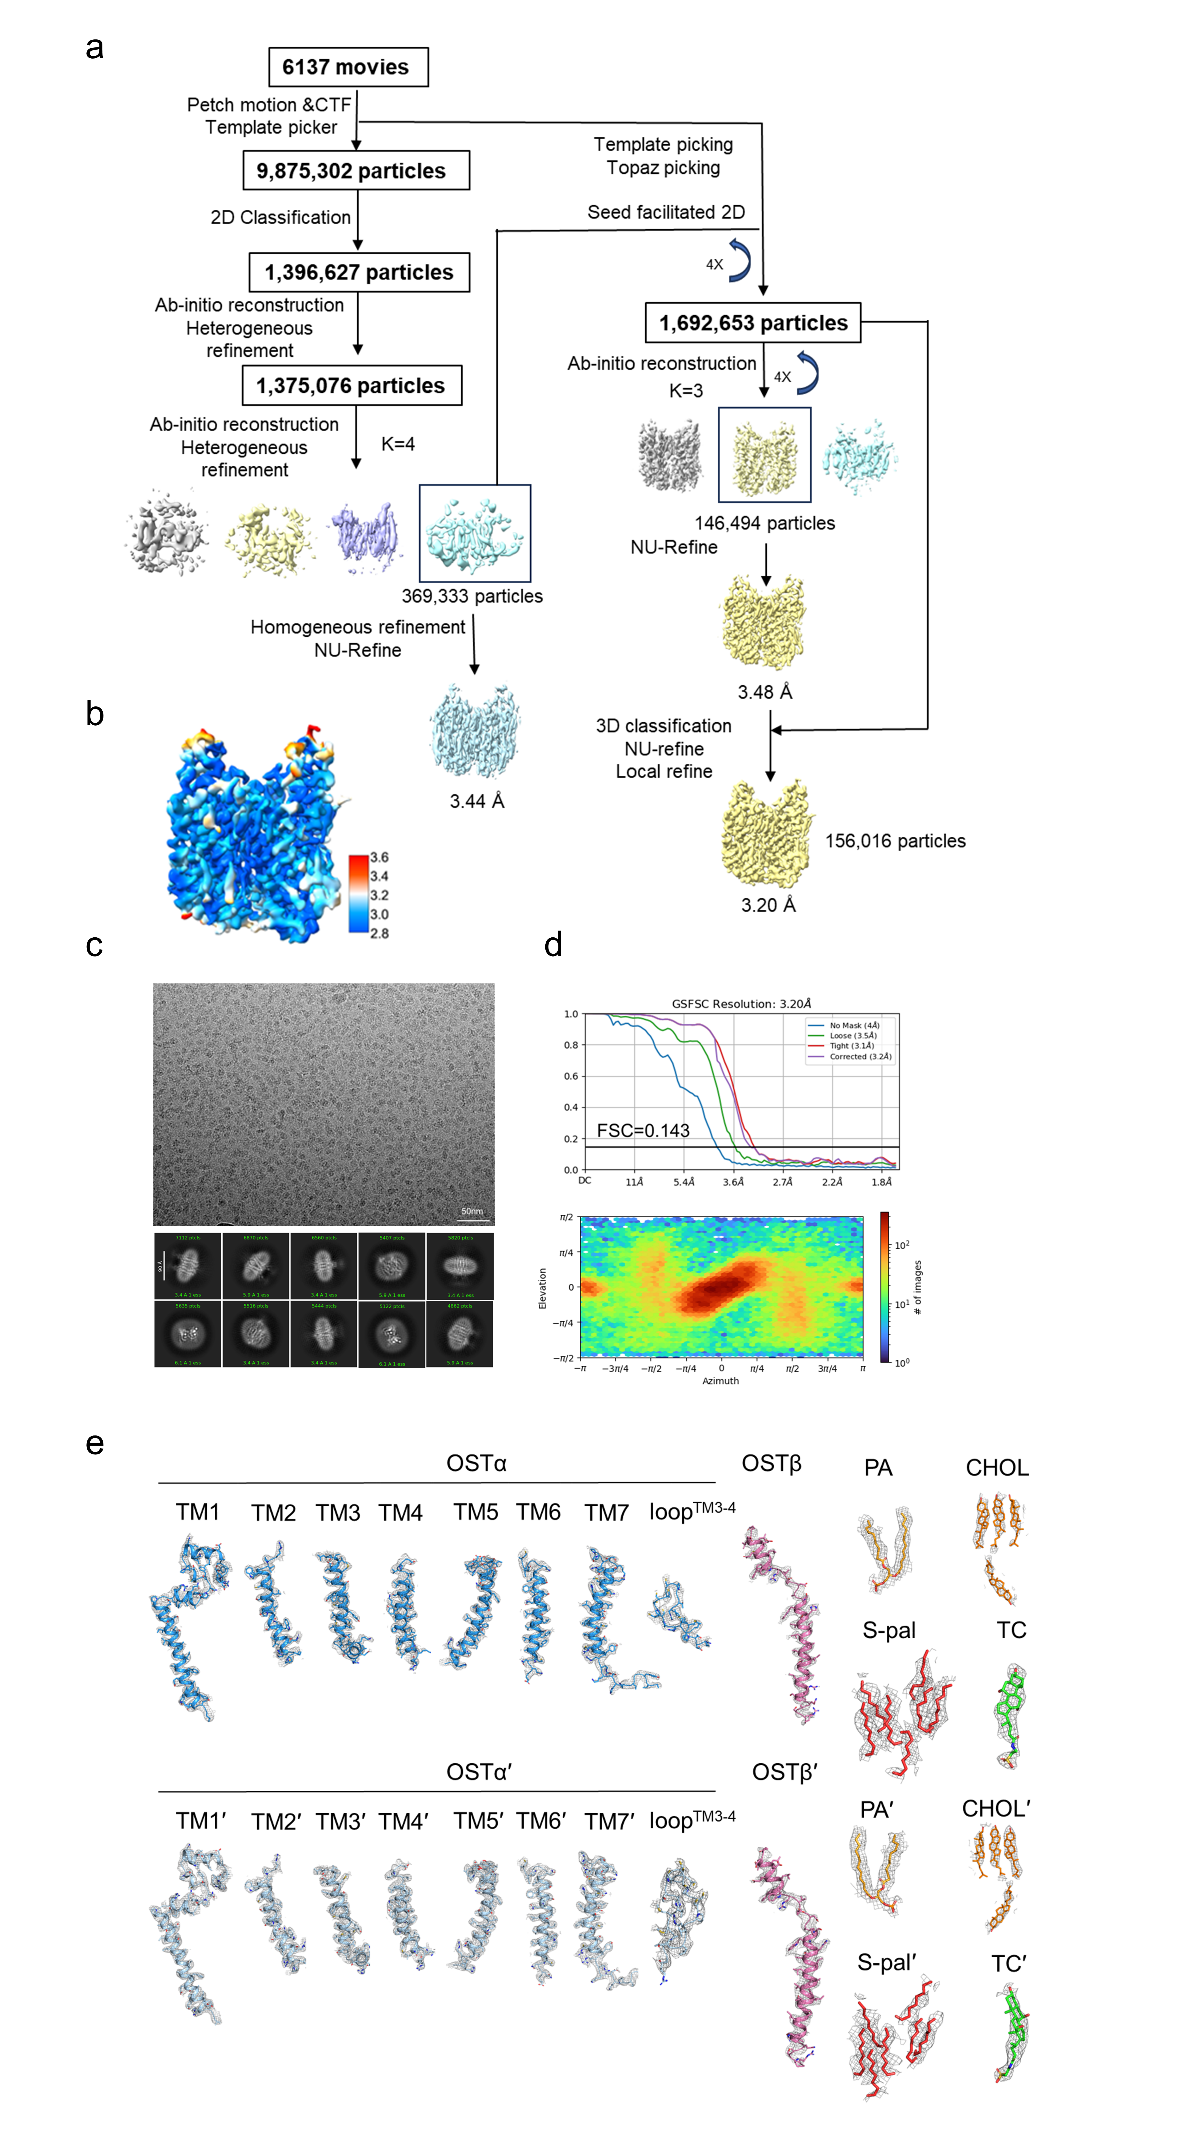


**Supplementary Fig. 4 Data processing and model building of TC bound OSTα/β complex**.

**a**. Flowchart of the cryo-EM data processing by cryoSPARC v4.7.1.

**b** Refined cryo-EM map of OSTα/β complex structure. The cryo-EM maps are colored by UCSF ChimeraX 1.5 according to the local resolution of the cryo-EM estimated by cryoSPARC 4.7.1

**c**. Representative cryo-EM micrograph and 2D averages. Bar: 50 nm.

**d**. Fourier shell correlation (FSC) curves and Euler angle distributions of the classified particles used for the final 3D refinement of the overall maps for TC bound OSTα/β complex.

**e**. Cryo-EM maps for representative segments of the TC bound OSTα/β complex. The structure was reconstructed with C1 symmetry, and all the representative segments are thus presented. Contour levels are set at 5σ except S-palmitoyl modification on the cysteine side chain which is at 3σ.


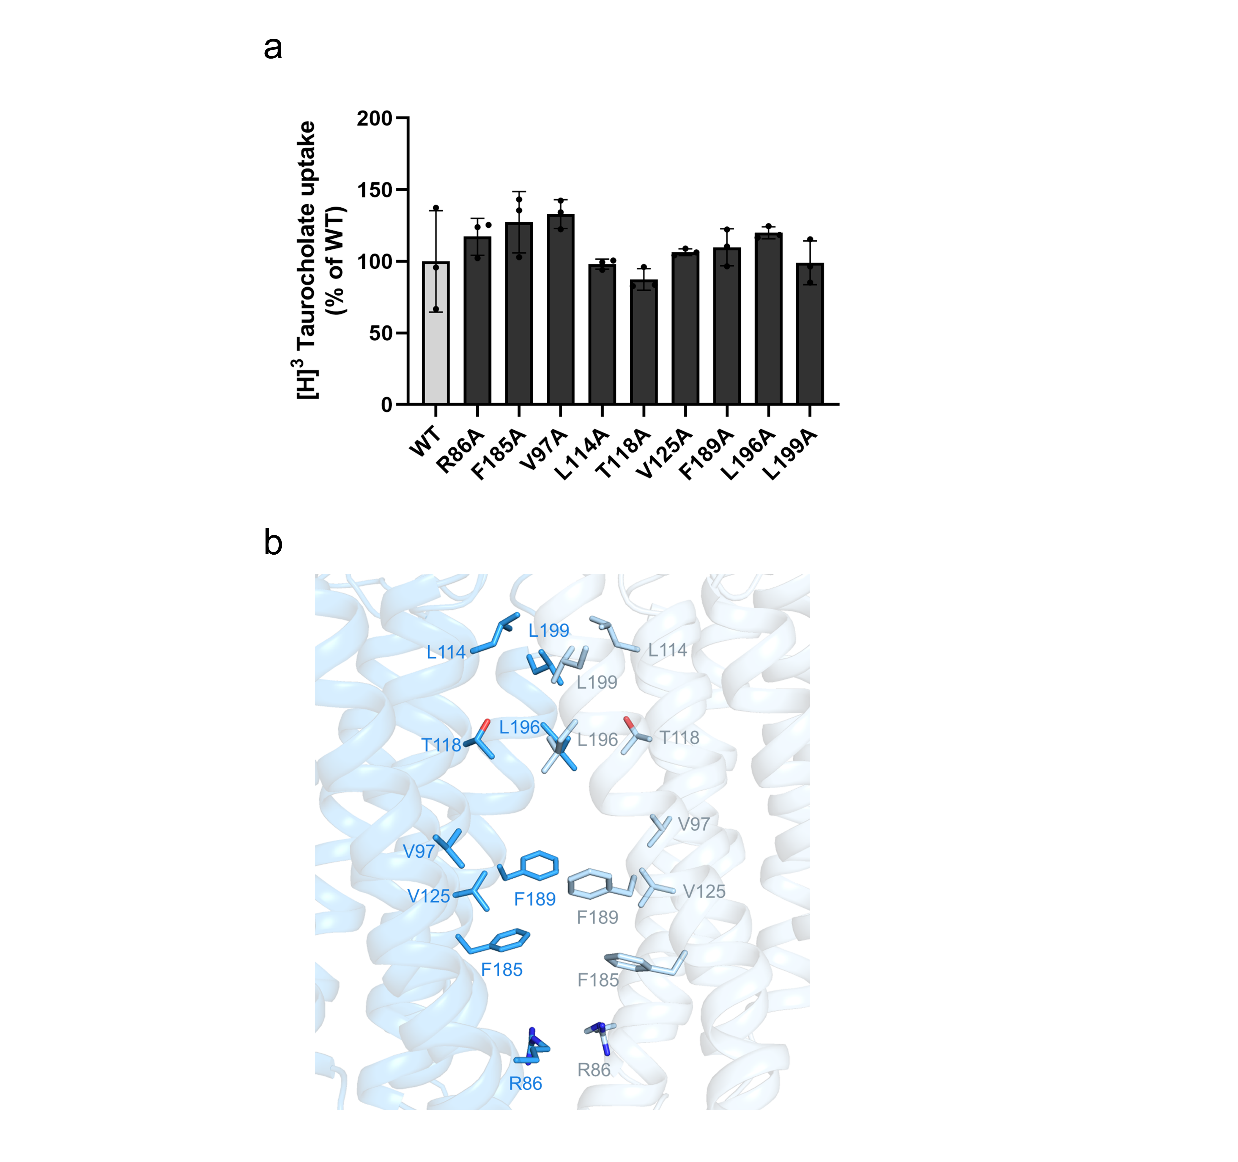


**Supplementary Fig. 5 Transport activities of wild-type OSTα/β complex and OSTα/β mutants at central channel residues.**

**a**. Transport activities of [³H] taurocholic acid mediated by the wild-type OSTα/β complex and OSTα/β mutants at central channel residues. The activity of the wild type was set to 100%. One‐way analysis of variance (ANOVA) is used for the comparison of statistical significance of wild-type OSTα/β (WT) with its mutants. The P values of < 0.05, 0.01, and 0.001 are indicated with *, **, and ***, respectively. **b**. Residue positions in the central cavity chosen for site-directed mutagenesis and functional transport assays.

**References:**

1. Abramson, J. et al. Structure and mechanism of the lactose permease of Escherichia coli. *Science* **301**, 610-5 (2003).

2. Yamashita, A., Singh, S.K., Kawate, T., Jin, Y. & Gouaux, E. Crystal structure of a bacterial homologue of Na+/Cl--dependent neurotransmitter transporters. *Nature* **437**, 215-223 (2005).

3. Ruprecht, J.J. et al. Structures of yeast mitochondrial ADP/ATP carriers support a domain-based alternating-access transport mechanism. *Proc Natl Acad Sci U S A* **111**, E426-34 (2014).

4. Han, L. et al. Molecular mechanism of substrate recognition and transport by the AtSWEET13 sugar transporter. *Proc Natl Acad Sci U S A* **114**, 10089-10094 (2017).
